# Supplementary material
Source: MDPI journal article supplement (https://www.mdpi.com/2073-445X/11/4/541)
Supplement: s1 [file s1 › land-1638982-supplementary.pdf]

## Supplementary material

- Pictures from study site

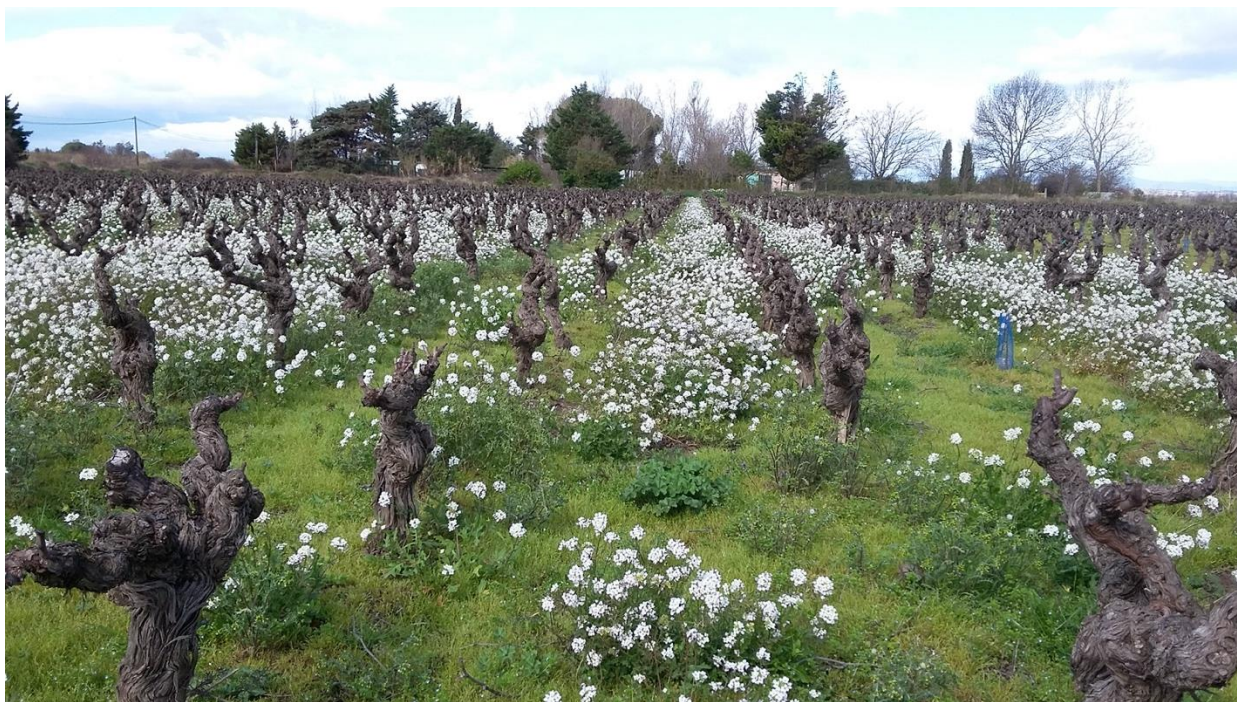

**Figure S1.** Gobelet-trained vines – picture by Aplena E.S. Bless.

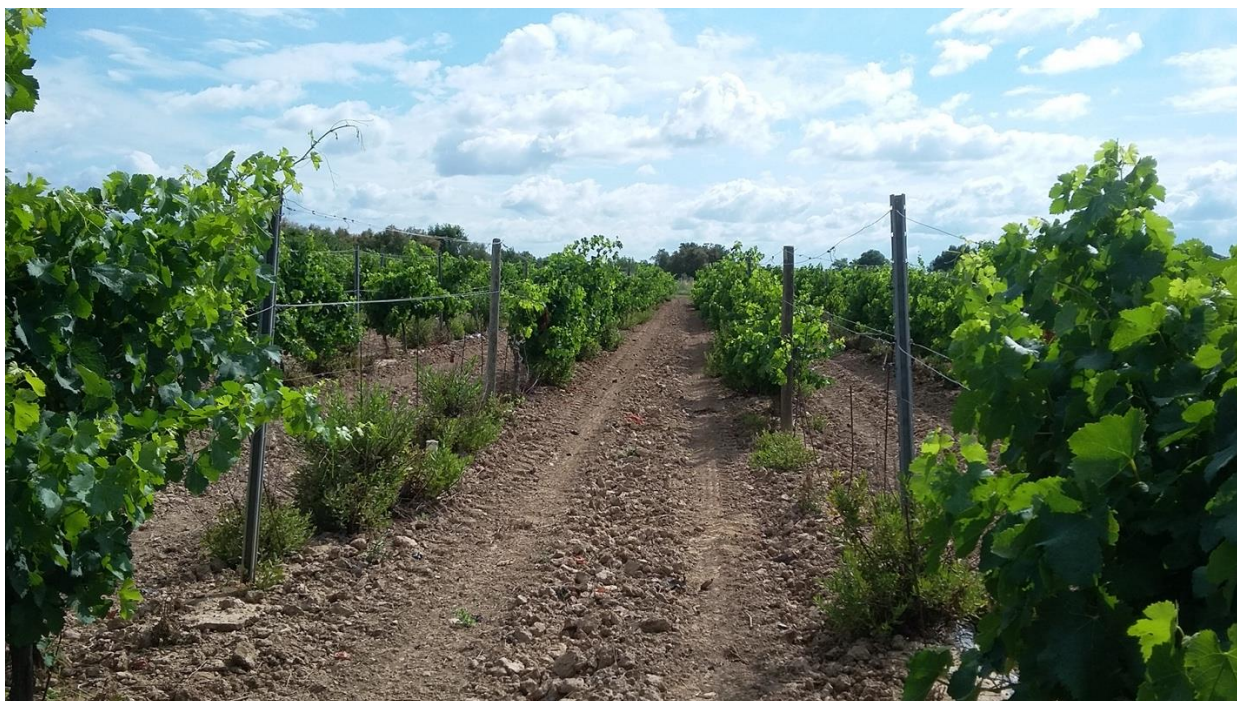

**Figure S2.** Trellised vines – picture by Aplena E.S. Bless.

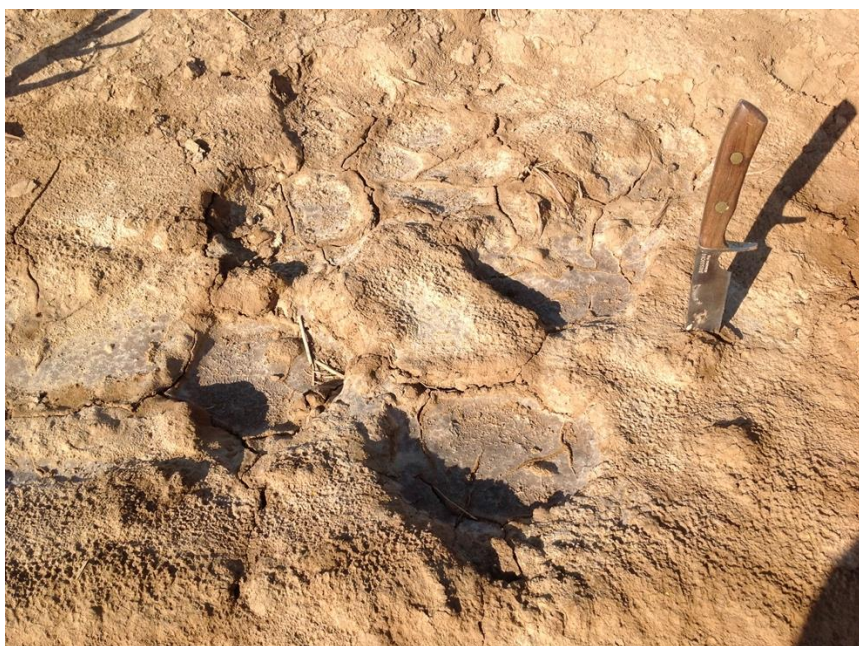

**Figure S3.** Degraded soil surface – picture by S. Follain.

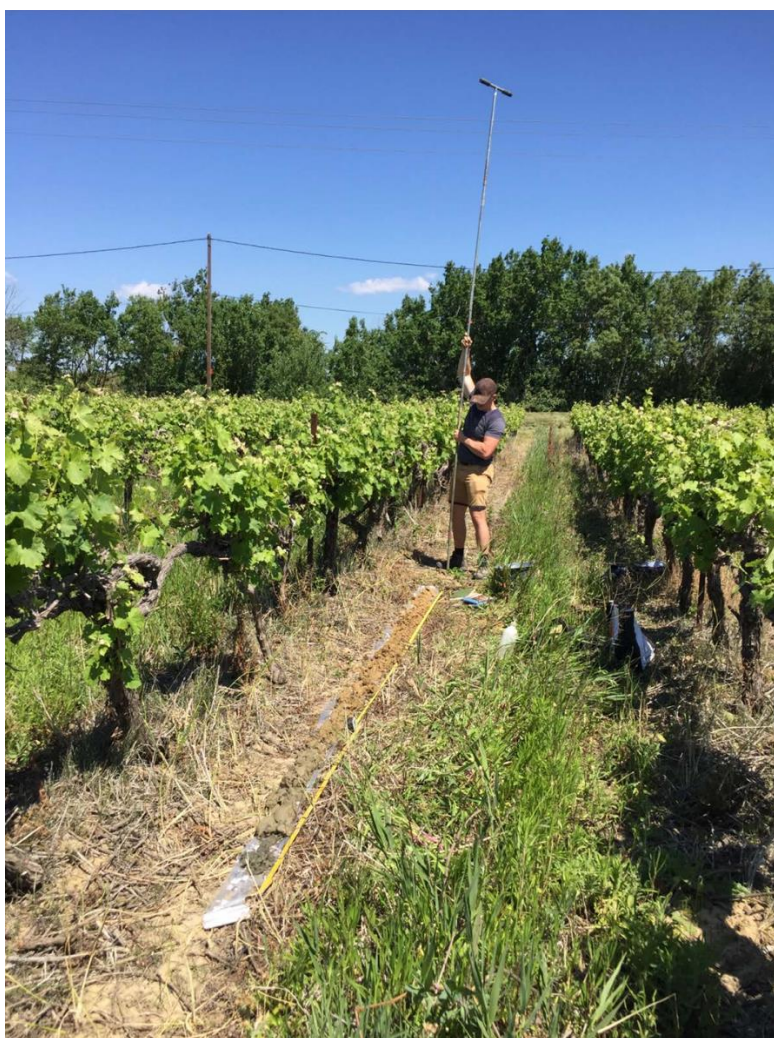

**Figure S4.** Hole drilling using the prospecting kit for geological surveys by Eijkelkamp (The Netherlands) – picture by A. Crabit.
